# Supplementary material
Source: Springer Nature journal article supplement (https://www.springermedizin.de/resource/supplementary/13023_2008_153_MOESM6_ESM.pdf/9641746)
Supplement: MOESM6 [file 9641746]

**Painful photosensitivity on sun-exposed skin  
with erythema, œdema, petechiae +  
stinging, prickling and burning  
*without blisters***

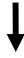

**Plasma fluorescence peak at  
634 nm testing**

**If positive**

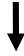

**Plasma / erythrocytic  
free protoporphyrin concentration +  
Faecal protoporphyrin concentration**

**If increased**

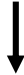

**Diagnosis: Erythropoietic Protoporphria  
*Or X Linked Dominant Protoporphria*  
*(If Zn-protoporphyrin % increased +++)***

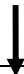

**(Determination of FECH activity level)  
*if available***

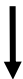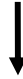

**Liver examination  
Liver function tests, viral  
hepatitis serology,  
hemochromatosis test,  
serum markers for hepatic  
fibrosis, Liver imaging  
Urinary coproporphyrin**

***FECH* mutation + IVS3-48C  
allele determination  
*ALAS2* mutations  
Genetic study of the family**
